# Supplementary material
Source: PubMed Central journal article supplement (PMC8049508)
Supplement: NIHMS1681329-supplement-Supplemental_Table_1.pdf [file NIHMS1681329-supplement-Supplemental_Table_1.pdf]

Supplemental Table 1 (heatmap)

Table with columns: Original row, Gene Name, GroupA mean, GroupA std.dev., GroupB mean, GroupB std.dev., Absolute t value, Degrees of freedom, Raw p value, Adj p value, False Discovery Rate. Rows are labeled 'Significant gene list'.

Table with columns: Original row, Gene Name, GroupA mean, GroupA std.dev., GroupB mean, GroupB std.dev., Absolute t value, Degrees of freedom, Raw p value, Adj p value, False Discovery Rate. Rows are labeled 'Non-significant gene list'.
