# Supplementary material
Source: PubMed Central journal article supplement (PMC8049508)
Supplement: NIHMS1681329-supplement-Supplemental_Table_2.pdf [file NIHMS1681329-supplement-Supplemental_Table_2.pdf]

# Supplemental Table 2 (heatmap)

|                       | Original row | Gene         | GroupA (Control) mean | GroupA (Control) std.dev. | GroupB (REJ) mean | GroupB (REJ) std.dev. | Absolute t value | Degrees of freedom | Raw p value | Adj p value | False Discovery Rate |
|-----------------------|--------------|--------------|-----------------------|---------------------------|-------------------|-----------------------|------------------|--------------------|-------------|-------------|----------------------|
| Significant gene list | 1            | MMP3         | -1.1444253            | 1.784176                  | 4.847768          | 3.415051              | 5.607315         | 18                 | 2.54E-05    | 2.54E-05    | 0.002238             |
|                       | 2            | IL8          | -0.77998984           | 1.778811                  | 4.705445          | 3.720921              | 4.795546         | 17                 | 1.68E-04    | 1.68E-04    | 0.007411             |
|                       | 3            | CSF3         | 0.10936117            | 1.35004                   | 4.28322           | 4.800298              | 3.017943         | 13                 | 0.009892    | 0.009892    | 0.048359             |
|                       | 4            | CXCL5        | 0.038066022           | 1.483132                  | 3.317778          | 4.061583              | 2.734853         | 15                 | 0.015347    | 0.015347    | 0.064309             |
|                       | 5            | MMP9         | -2.0277085            | 2.930432                  | 2.297222          | 2.134047              | 4.301574         | 21                 | 3.16E-04    | 3.16E-04    | 0.004633             |
|                       | 6            | IL1B         | -1.144222             | 1.92151                   | 2.243683          | 4.777408              | 2.372195         | 15                 | 0.031488    | 0.031488    | 0.098663             |
|                       | 8            | CXCL1        | -1.2608813            | 2.354877                  | 2.179928          | 2.53956               | 3.582082         | 23                 | 0.001578    | 0.001578    | 0.013884             |
|                       | 9            | CCL7         | -0.5148121            | 1.012897                  | 2.173177          | 2.986633              | 3.073098         | 14                 | 0.008262    | 0.008262    | 0.045442             |
|                       | 10           | ICAM1        | -2.1985965            | 2.481911                  | 2.074404          | 3.279101              | 3.746297         | 22                 | 0.001118    | 0.001118    | 0.014049             |
|                       | 11           | CEBPB        | -2.1007123            | 2.88485                   | 2.023696          | 1.835376              | 4.349187         | 20                 | 3.11E-04    | 3.11E-04    | 0.005474             |
|                       | 13           | IL10         | -0.2717428            | 0.670777                  | 1.930243          | 2.000928              | 3.762079         | 14                 | 0.002103    | 0.002103    | 0.015419             |
|                       | 14           | CCR4         | 0.4074066             | 1.078048                  | 1.874938          | 2.046558              | 2.287486         | 18                 | 0.03449     | 0.03449     | 0.10117              |
|                       | 15           | CXCL2        | -1.0588307            | 2.04236                   | 1.853185          | 3.63746               | 2.516874         | 18                 | 0.021538    | 0.021538    | 0.075815             |
|                       | 16           | IL23A        | 0.14049867            | 0.67669                   | 1.780661          | 1.423934              | 3.751041         | 17                 | 0.001591    | 0.001591    | 0.012731             |
|                       | 17           | IL21         | -0.0740823            | 1.548112                  | 1.743046          | 1.725185              | 2.826521         | 23                 | 0.009568    | 0.009568    | 0.049528             |
|                       | 18           | IL1R1        | -0.06664349           | 0.607934                  | 1.721011          | 1.48883               | 4.007968         | 15                 | 0.001141    | 0.001141    | 0.012548             |
|                       | 19           | IFNG         | -0.17466003           | 1.365734                  | 1.647037          | 2.164105              | 2.568987         | 20                 | 0.018313    | 0.018313    | 0.070067             |
|                       | 20           | CCL1         | 0.012831321           | 0.921896                  | 1.559582          | 1.930389              | 2.606964         | 17                 | 0.018413    | 0.018413    | 0.067514             |
|                       | 23           | RUNX1        | -0.8500922            | 1.557826                  | 1.482528          | 1.061636              | 4.461322         | 21                 | 2.16E-04    | 2.16E-04    | 0.006326             |
|                       | 24           | CCL22        | -0.47456095           | 2.278004                  | 1.480148          | 2.203568              | 2.23712          | 23                 | 0.036271    | 0.036271    | 0.102963             |
|                       | 25           | CCL2         | -1.289582             | 2.062592                  | 1.3604            | 2.965355              | 2.645142         | 21                 | 0.015138    | 0.015138    | 0.066608             |
|                       | 26           | TGFB1        | -0.6453202            | 1.647945                  | 1.349177          | 1.027014              | 3.703453         | 20                 | 0.001406    | 0.001406    | 0.013746             |
|                       | 27           | CLEC7A       | -0.39263222           | 0.767617                  | 1.344511          | 1.188143              | 4.427846         | 20                 | 2.59E-04    | 2.59E-04    | 0.005695             |
|                       | 28           | STAT5A       | -0.2907005            | 1.313426                  | 1.244116          | 0.931479              | 3.436755         | 21                 | 0.002475    | 0.002475    | 0.016753             |
|                       | 30           | IL27         | -0.015112217          | 0.657186                  | 1.138631          | 1.202886              | 3.034851         | 18                 | 0.007124    | 0.007124    | 0.044779             |
|                       | 31           | CD28         | -0.028763404          | 1.134382                  | 1.083053          | 1.554382              | 2.083206         | 21                 | 0.04964     | 0.04964     | 0.121342             |
|                       | 32           | CXCL12       | 0.13117975            | 0.73751                   | 1.018096          | 1.190566              | 2.283361         | 20                 | 0.033481    | 0.033481    | 0.101597             |
|                       | 33           | IL17RA       | 0.168024              | 0.495032                  | 0.942598          | 0.933213              | 2.64371          | 18                 | 0.016507    | 0.016507    | 0.066027             |
|                       | 36           | IL12RB1      | -0.15710852           | 0.827224                  | 0.84905           | 1.070963              | 2.680948         | 22                 | 0.013649    | 0.013649    | 0.063217             |
|                       | 40           | IRF4         | -1.4378442            | 2.500286                  | 0.748576          | 2.862384              | 2.074204         | 20                 | 0.049438    | 0.049438    | 0.124301             |
|                       | 42           | CD8A         | -0.5506776            | 0.959846                  | 0.65197           | 1.719309              | 2.202133         | 18                 | 0.040934    | 0.040934    | 0.109158             |
|                       | 44           | JAK2         | 0.09812588            | 0.376608                  | 0.642146          | 0.696808              | 2.476413         | 18                 | 0.023427    | 0.023427    | 0.079293             |
|                       | 52           | NFATC2       | -1.3247625            | 1.65307                   | 0.365477          | 2.176616              | 2.229723         | 22                 | 0.03629     | 0.03629     | 0.099798             |
|                       | 73           | CD40LG       | 0.37606114            | 0.661071                  | -0.506            | 1.288047              | 2.196687         | 17                 | 0.042199    | 0.042199    | 0.10922              |
|                       | 85           | IL17RE       | 0.19638473            | 0.923816                  | -2.16336          | 3.25084               | 2.517541         | 13                 | 0.025723    | 0.025723    | 0.083838             |
|                       | 88           | RORC         | 0.15016642            | 0.716562                  | -3.7453           | 4.371808              | 3.170394         | 12                 | 0.008064    | 0.008064    | 0.047307             |
|                       | 7            | SOCS3        | 0.086661615           | 0.9459635                 | 2.2105625         | 4.4089828             | 1.7126155        | 13                 | 0.11051622  | 0.11051622  | 0.22617273           |
|                       | 12           | IL6          | -0.47415444           | 1.6433891                 | 1.995754          | 4.353084              | 1.913916         | 15                 | 0.07490773  | 0.07490773  | 0.164797             |
|                       | 21           | CSF2         | -0.01965497           | 1.022041                  | 1.5504382         | 2.9578817             | 1.8089443        | 14                 | 0.091979384 | 0.091979384 | 0.19271871           |
|                       | 22           | IL22         | 0.15175483            | 1.2823931                 | 1.5202632         | 2.7598715             | 1.621363         | 16                 | 0.12447728  | 0.12447728  | 0.24342224           |
|                       | 29           | IL3          | -0.051660538          | 0.95721173                | 1.1683787         | 1.8770227             | 2.087757         | 17                 | 0.0521806   | 0.0521806   | 0.124105215          |
|                       | 34           | CCL20        | -0.27664986           | 3.660953                  | 0.9390204         | 2.6076338             | 0.9751843        | 21                 | 0.34056932  | 0.34056932  | 0.49131313           |
| 35                    | IL17F        | -0.010258345 | 1.3555764             | 0.89608896                | 1.863716          | 1.418003              | 21               | 0.17085905         | 0.17085905  | 0.29481563  |                      |
| 37                    | IL4          | 0.11340838   | 1.0171885             | 0.8010439                 | 1.5728035         | 1.32366               | 20               | 0.20054777         | 0.20054777  | 0.32087642  |                      |
| 38                    | TNF          | -0.43827978  | 1.4275063             | 0.7627905                 | 2.3508186         | 1.5804652             | 19               | 0.13050449         | 0.13050449  | 0.28666078  |                      |
| 39                    | IL17C        | 0.1968591    | 0.97566134            | 0.76516384                | 1.6816406         | 1.0539422             | 19               | 0.30512846         | 0.30512846  | 0.45510682  |                      |
| 41                    | ICOS         | 0.21152717   | 0.97045183            | 0.67374736                | 1.5707563         | 0.9026015             | 19               | 0.3070301          | 0.3070301   | 0.51979136  |                      |
| 43                    | S1PR1        | -0.3939973   | 1.2599405             | 0.6498113                 | 3.9086366         | 0.9164333             | 14               | 0.37495646         | 0.37495646  | 0.5237487   |                      |
| 45                    | IL12B        | 0.16090837   | 1.229505              | 0.62968224                | 1.4940349         | 0.87352926            | 23               | 0.3914041          | 0.3914041   | 0.51408297  |                      |
| 46                    | GATA3        | 0.2503928    | 0.6528514             | 0.5703091                 | 1.1518172         | 0.8912238             | 18               | 0.3951037          | 0.3951037   | 0.51131017  |                      |
| 47                    | IL25         | 0.21046059   | 0.96987545            | 0.5152768                 | 1.1598654         | 0.7269034             | 23               | 0.4746193          | 0.4746193   | 0.5800903   |                      |
| 48                    | IL12RB2      | 0.25662968   | 0.9047446             | 0.5002421                 | 2.4209135         | 0.33986223            | 15               | 0.73867255         | 0.73867255  | 0.7831709   |                      |
| 49                    | FOXP3        | 0.03171101   | 1.0223359             | 0.49590418                | 2.8892667         | 0.5460914             | 14               | 0.5395974          | 0.5395974   | 0.66969967  |                      |
| 50                    | CX3CL1       | -0.53811926  | 1.5270754             | 0.43097788                | 3.6048846         | 0.89250165            | 16               | 0.3853509          | 0.3853509   | 0.5138012   |                      |
| 51                    | CD34         | -1.2976941   | 2.4890594             | 0.42903745                | 3.848098          | 1.584791              | 20               | 0.18943831         | 0.18943831  | 0.31453907  |                      |
| 53                    | IL17A        | 0.20313028   | 0.9431474             | 0.34906572                | 1.1078364         | 0.36165094            | 23               | 0.7209141          | 0.7209141   | 0.77366394  |                      |
| 54                    | NFKB1        | -0.1364021   | 0.9216364             | 0.34537587                | 0.7858272         | 1.4342098             | 23               | 0.16496968         | 0.16496968  | 0.29034665  |                      |
| 55                    | TBX21        | -0.11045862  | 0.6966325             | 0.34086147                | 2.6165524         | 0.600974              | 13               | 0.5681909          | 0.5681909   | 0.6379324   |                      |
| 56                    | CXCL6        | -2.2826843   | 3.4535172             | 0.33706263                | 3.4978885         | 1.9216624             | 23               | 0.06712425         | 0.06712425  | 0.15145984  |                      |
| 57                    | IL17D        | 0.27749068   | 0.8211776             | 0.27873003                | 1.0272231         | 0.003397866           | 22               | 0.9973195          | 0.9973195   | 0.9973195   |                      |
| 58                    | IL9          | 0.05395706   | 0.88612354            | 0.25031552                | 1.1598655         | 0.485043              | 22               | 0.6324407          | 0.6324407   | 0.69568473  |                      |
| 59                    | STAT3        | -0.007240561 | 0.3997785             | 0.19829887                | 0.6336304         | 0.9891572             | 20               | 0.33440313         | 0.33440313  | 0.49045792  |                      |
| 60                    | ISG20        | -0.13243845  | 0.5302192             | 0.17590094                | 1.044092          | 0.9493813             | 17               | 0.3557292          | 0.3557292   | 0.50490594  |                      |
| 61                    | ACTB         | -0.0357      | 0.40044415            | 0.012674057               | 1.1346012         | 0.14496014            | 14               | 0.8868086          | 0.8868086   | 0.9290376   |                      |
| 62                    | IL13         | -0.09230452  | 0.91346645            | -0.007719114              | 1.9757553         | 0.1401097             | 16               | 0.89032197         | 0.89032197  | 0.9217451   |                      |
| 63                    | RORA         | -2.2399738   | 2.855033              | -0.09359191               | 4.228866          | 1.5174631             | 21               | 0.14406709         | 0.14406709  | 0.26973084  |                      |
| 64                    | STAT6        | 0.18517984   | 0.52125674            | -0.10315771               | 0.5899058         | 1.3206357             | 23               | 0.1996138          | 0.1996138   | 0.32529655  |                      |
| 65                    | IL5          | -0.23897912  | 1.3861959             | -0.15538582               | 2.1729805         | 0.11693606            | 20               | 0.908077           | 0.908077    | 0.92919505  |                      |
| 66                    | RPLP0        | -0.004749041 | 0.44829947            | -0.20279036               | 0.85369855        | 0.7405235             | 18               | 0.46853286         | 0.46853286  | 0.5807168   |                      |
| 67                    | TLR4         | -0.3150235   | 2.8946583             | -0.22391492               | 4.1187763         | 1.999016              | 21               | 0.058714088        | 0.058714088 | 0.13596946  |                      |
| 68                    | SYK          | 0.02230866   | 0.30612954            | -0.28458259               | 0.9386019         | 1.1207871             | 14               | 0.28123656         | 0.28123656  | 0.42670372  |                      |
| 69                    | GAPDH        | 0.018786598  | 0.27775937            | -0.29656628               | 0.83920634        | 1.2862545             | 14               | 0.21921974         | 0.21921974  | 0.34448817  |                      |
| 70                    | B2M          | 0.0563875    | 0.36197394            | -0.38902313               | 0.903794          | 1.6495221             | 15               | 0.11981962         | 0.11981962  | 0.23963294  |                      |
| 71                    | JAK1         | -1.4258295   | 3.3265228             | -0.4414557                | 3.3058982         | 0.75678504            | 23               | 0.45686153         | 0.45686153  | 0.57430116  |                      |
| 72                    | IL2          | 0.039067123  | 0.8999731             | -0.50127417               | 1.9582388         | 0.9039893             | 16               | 0.379411           | 0.379411    | 0.5136641   |                      |
| 74                    | IL23R        | 0.036720164  | 1.290044              | -0.60663265               | 0.90334606        | 1.4729004             | 21               | 0.15560898         | 0.15560898  | 0.28528312  |                      |
| 75                    | IL17RB       | -1.3346807   | 2.2088947             | -0.6165451                | 2.8382835         | 0.7199358             | 22               | 0.47914404         | 0.47914404  | 0.5775983   |                      |
| 76                    | SOCS1        | -1.3944854   | 2.1065753             | -0.6823342                | 4.5766664         | 0.50964504            | 16               | 0.6172575          | 0.6172575   | 0.68757796  |                      |
| 77                    | IL7R         | -0.3151273   | 1.858716              | -0.846961                 | 3.571931          | 0.47622144            | 18               | 0.6396459          | 0.6396459   | 0.6949239   |                      |
| 78                    | CCR2         | -0.12979156  | 1.3238297             | -0.8895675                | 3.8196285         | 0.6776469             | 14               | 0.50904036         | 0.50904036  | 0.597274    |                      |
| 79                    | STAT4        | -0.15490566  | 0.90747935            | -0.95160484               | 4.196786          | 0.66901684            | 13               | 0.5151904          | 0.5151904   | 0.5965363   |                      |
| 80                    | IL15         | -0.9261018   | 2.2414641             | -0.9984778                | 3.1297202         | 0.0677892             | 21               | 0.9465957          | 0.9465957   | 0.95747614  |                      |
| 81                    | CCR6         | -2.0807776   | 3.0806565             | -1.0121806                | 3.4738288         | 0.8298166             | 23               | 0.41517276         | 0.41517276  | 0.52949566  |                      |
| 82                    | IL18         | 0.14640278   | 0.41633108            | -1.0211385                | 2.9930534         | 1.3930545             | 12               | 0.18887237         | 0.18887237  | 0.31963018  |                      |
| 83                    | IL6R         | -0.6150403   | 1.918875              | -1.3403397                | 3.2416258         | 0.6942157             | 19               | 0.4959484          | 0.4959484   | 0.5897675   |                      |
| 84                    | CD4          | -0.48008493  | 1.4807068             | -2.020853                 | 4.4147964         | 1.1930264             | 14               | 0.25268614         | 0.25268614  | 0.39011195  |                      |
| 86                    | IL17RC       | -1.0864669   | 2.2240877             | -2.8301082                | 3.7271116         | 1.4484792             | 19               | 0.16378585         | 0.16378585  | 0.294146    |                      |
| 87                    | TRAF6        | -0.44733626  | 1.6156528             | -3.0489354                | 4.7054996         | 1.8854126             | 14               | 0.08029872         | 0.08029872  | 0.17234847  |                      |
