# Supplementary material
Source: PubMed Central journal article supplement (PMC8049508)

# Supplemental Figure 1

**A**

ITx Rejection: Reminiscent of Crohn's Disease

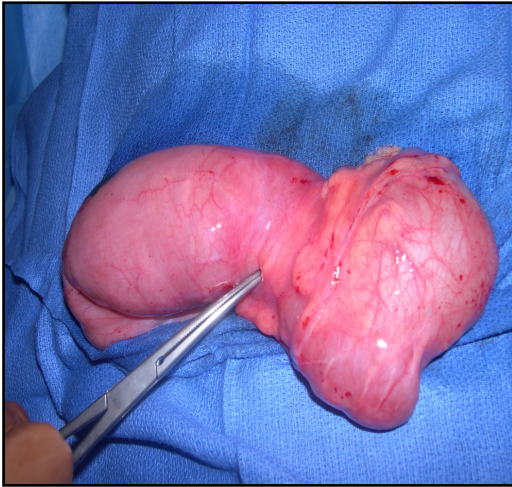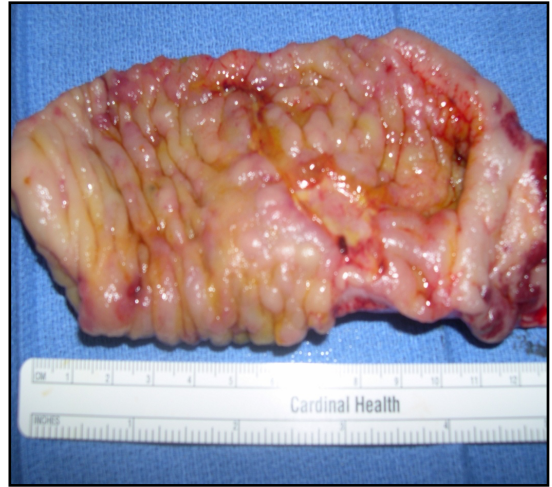

**B**

Control

Rejection

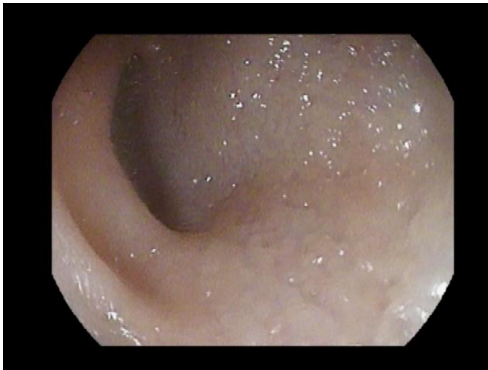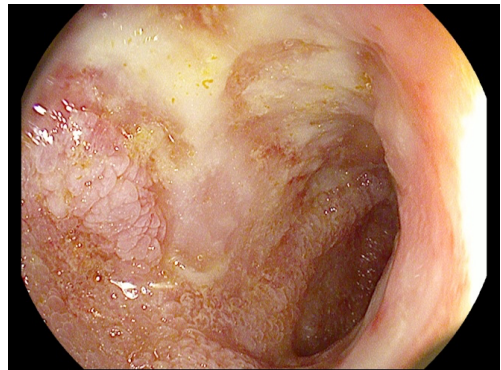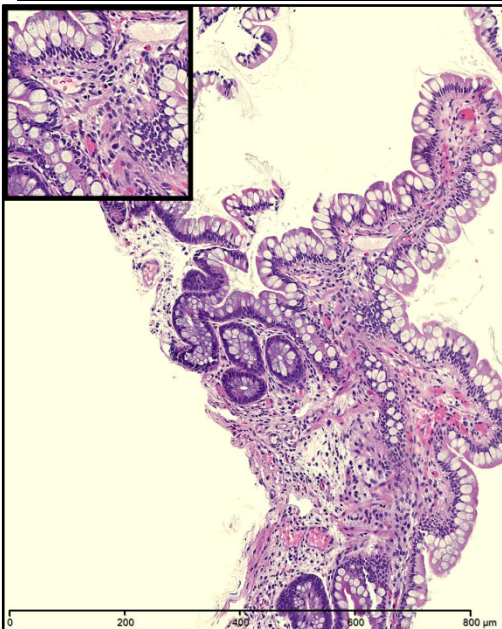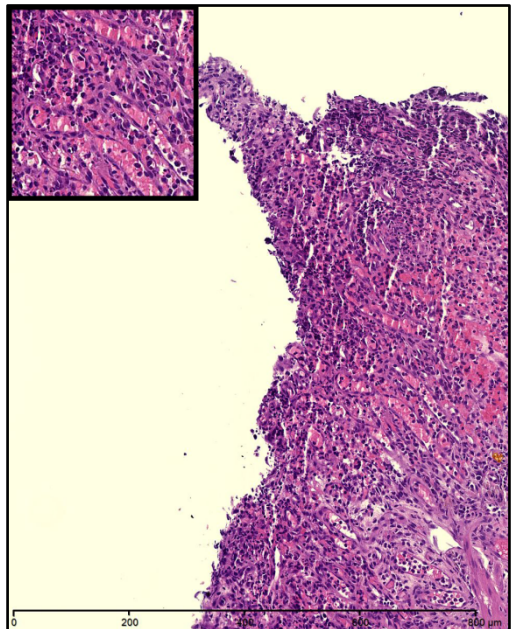

Supplement: NIHMS1681329-supplement-Supplemental_Figure_1.pdf [file NIHMS1681329-supplement-Supplemental_Figure_1.pdf]

# Supplemental Figure 2

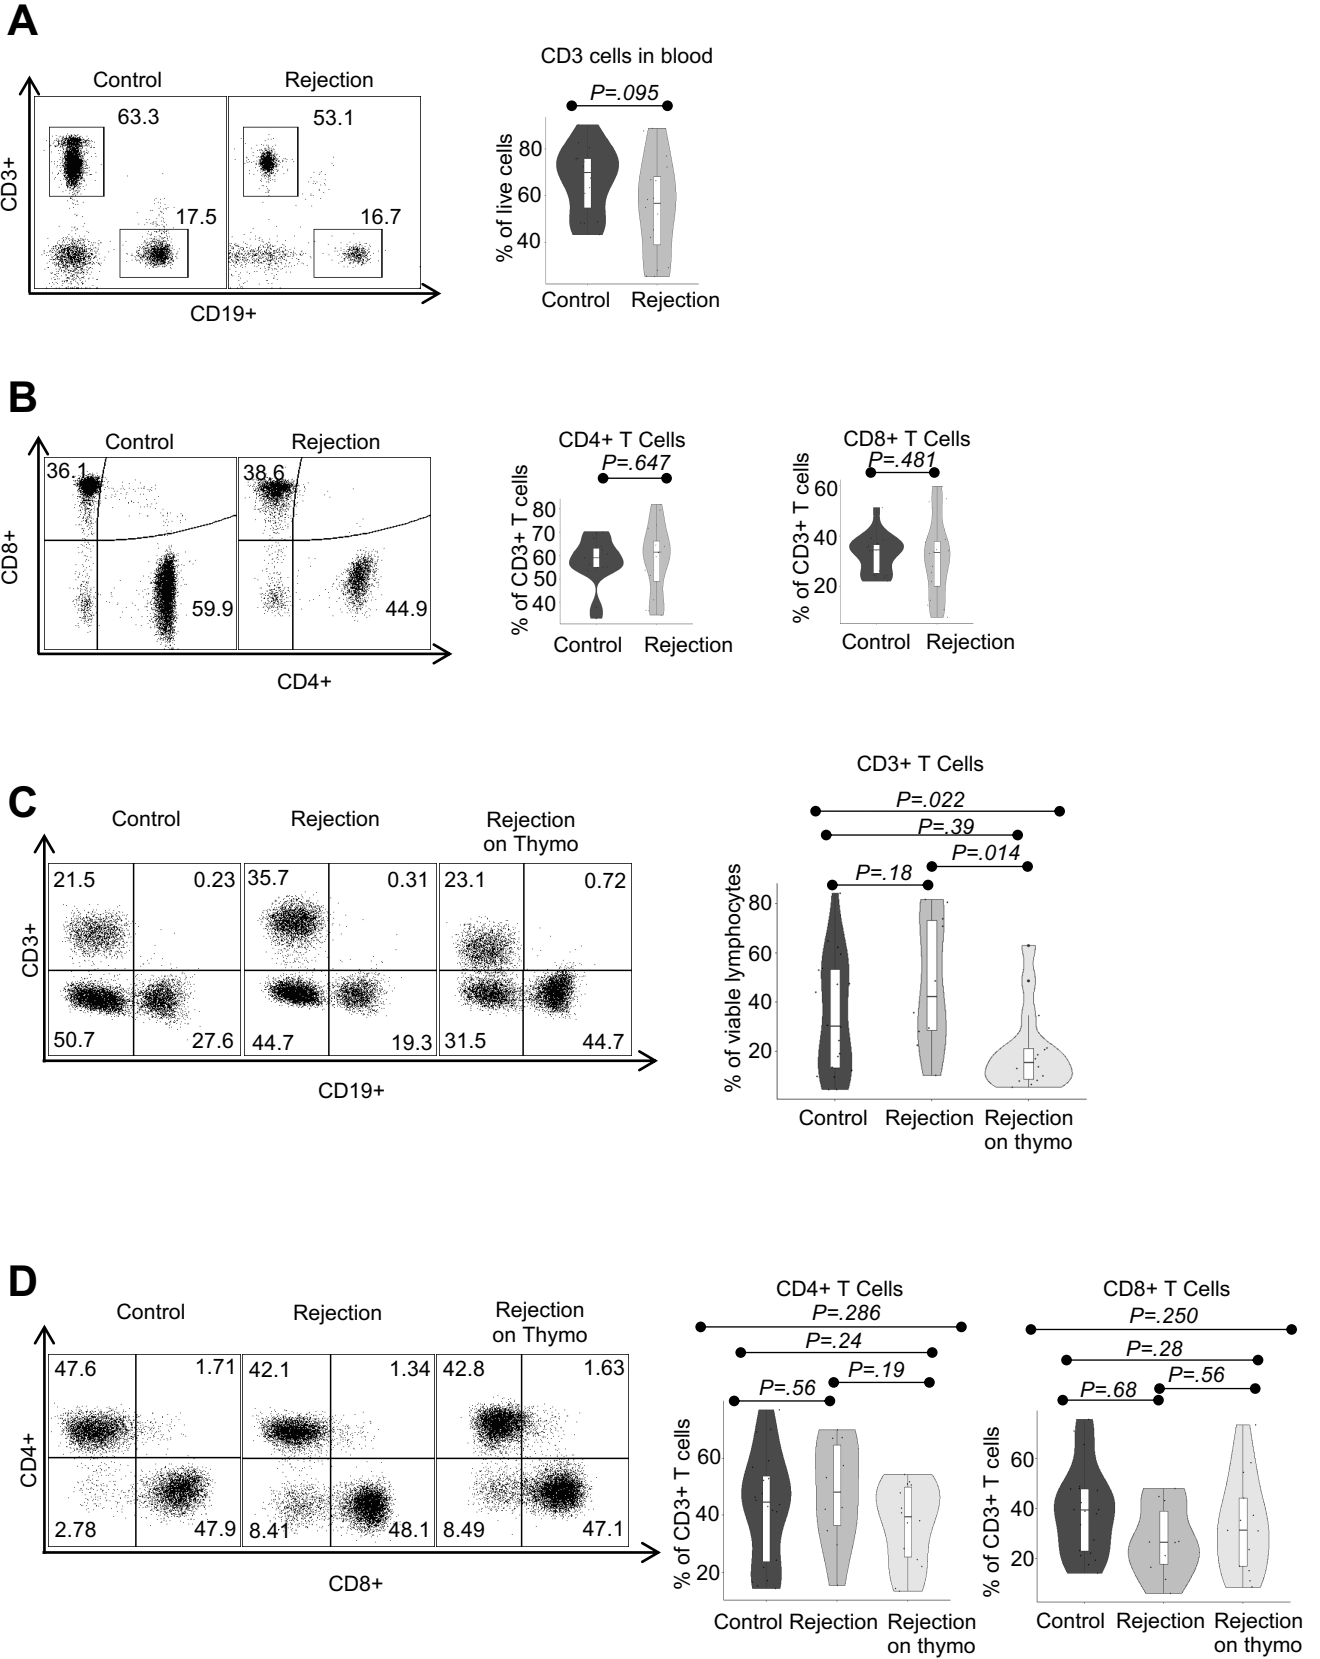

Supplement: NIHMS1681329-supplement-Supplemental_Figure_2.pdf [file NIHMS1681329-supplement-Supplemental_Figure_2.pdf]

# Supplemental Figure 3

**A**

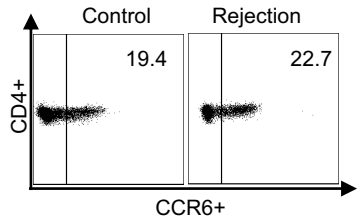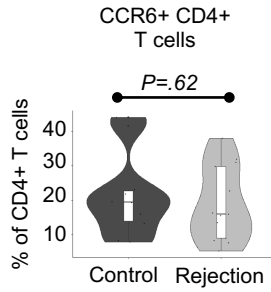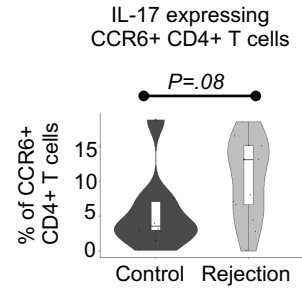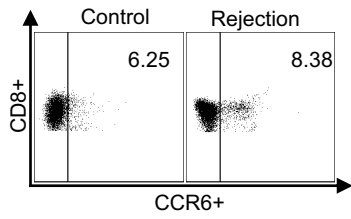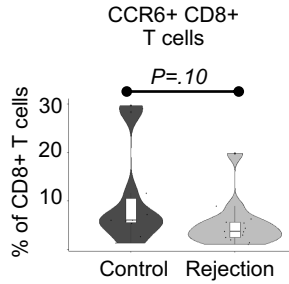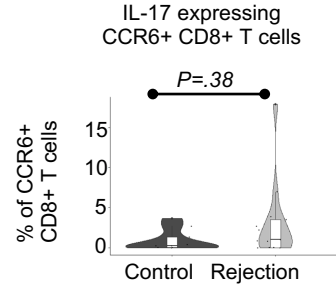

**B**

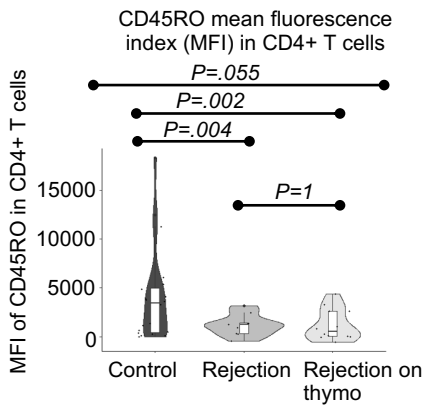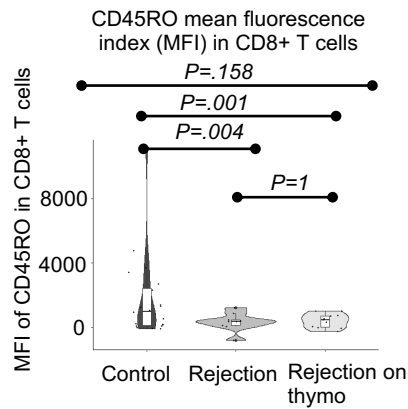

Supplement: NIHMS1681329-supplement-Supplemental_Figure_3.pdf [file NIHMS1681329-supplement-Supplemental_Figure_3.pdf]

# Supplemental Figure 4

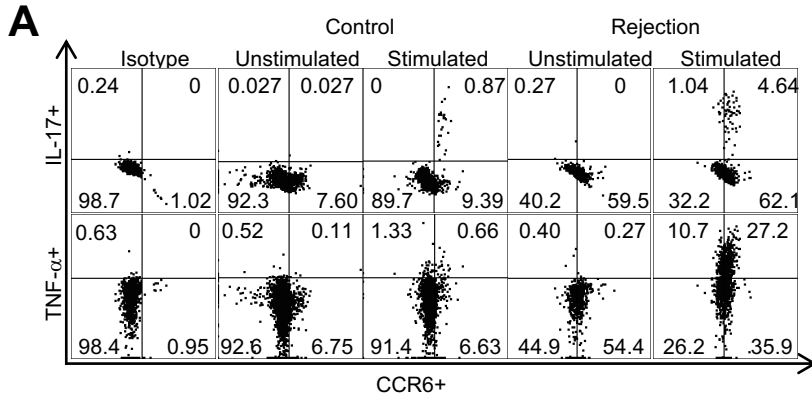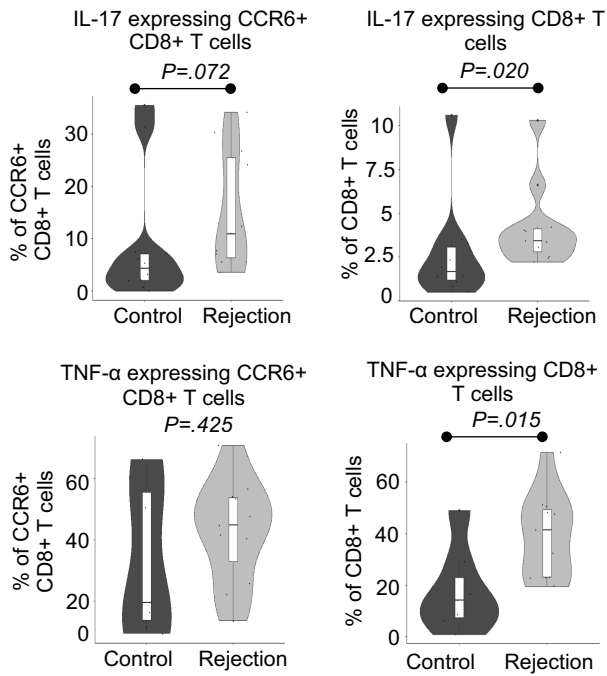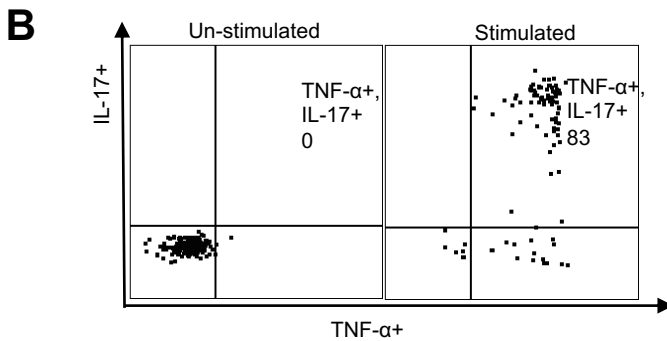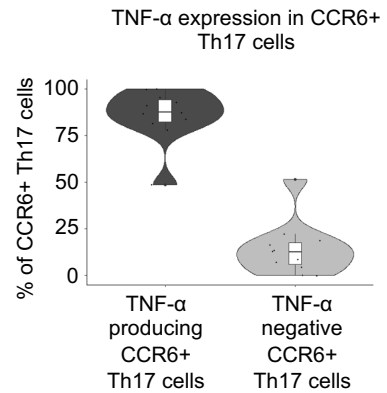

Supplement: NIHMS1681329-supplement-Supplemental_Figure_4.pdf [file NIHMS1681329-supplement-Supplemental_Figure_4.pdf]
